# Supplementary material for: ER and PI3K Pathway Activity in Primary ER Positive Breast Cancer Is Associated with Progression-Free Survival of Metastatic Patients under First-Line Tamoxifen
Source: Cancers (Basel). 2020 Mar 27;12(4):802. doi: 10.3390/cancers12040802 (PMC7226576; doi:10.3390/cancers12040802)
Supplement: Supplementary file 1 [file cancers-12-00802-s001.xlsx]

## Sheet: Table S1
Array	Age at diagnosis	Grade	ER protein status	PR protein status	LN ESR1 RTqPCR	LN PGR RTqPCR	ERBB2 RTqPCR status	PIK3CA
GSM2185277	51	unknown	pos	pos	1.91	0.12	not amplified	WT
GSM2185278	57	unknown	pos	pos	2.94	0.8	not amplified	WT
GSM2185281	74	poor	pos	pos	3.11	1.8	not amplified	WT
GSM2185282	47	poor	pos	pos	0.49	0.67	amplified	WT
GSM2185283	56	moderate	pos	neg	2.7	-0.86	not amplified	unknown
GSM2185284	78	good	pos	pos	2.42	-3.47	not amplified	mutated
GSM2185285	67	unknown	pos	neg	2.44	-3.63	not amplified	unknown
GSM2185286	44	unknown	pos	pos	1.73	0.06	not amplified	WT
GSM2185287	64	moderate	pos	neg	2.62	-2.53	not amplified	unknown
GSM2185295	52	poor	pos	pos	-3.51	-4.61	not amplified	unknown
GSM2185297	60	poor	pos	pos	1.33	-1.5	not amplified	unknown
GSM2185299	62	moderate	pos	pos	3.28	-3.5	amplified	WT
GSM2185300	68	poor	pos	pos	2.27	-0.6	not amplified	unknown
GSM2185302	49	poor	pos	pos	2.52	0.67	not amplified	WT
GSM2185303	81	unknown	pos	pos	0.99	0.2	not amplified	WT
GSM2185304	46	unknown	pos	pos	1.57	0.86	not amplified	WT
GSM2185305	68	poor	pos	pos	2.02	-0.06	amplified	mutated
GSM2185306	42	poor	pos	pos	1.34	-0.63	not amplified	WT
GSM2185311	44	poor	pos	pos	2.92	0.83	not amplified	mutated
GSM2185312	36	unknown	pos	pos	2.37	-0.05	not amplified	WT
GSM2185313	74	poor	pos	pos	3.64	-1.42	not amplified	mutated
GSM2185314	48	poor	pos	pos	unknown	unknown	unknown	unknown
GSM2185315	47	unknown	pos	pos	-0.81	0.91	not amplified	mutated
GSM2185316	39	poor	pos	pos	unknown	unknown	unknown	unknown
GSM2185317	40	unknown	pos	pos	2.27	1.8	not amplified	unknown
GSM2185318	48	poor	pos	pos	unknown	unknown	unknown	unknown
GSM2185319	61	unknown	pos	pos	2.93	-0.65	not amplified	WT
GSM2185320	50	unknown	pos	pos	unknown	unknown	unknown	unknown
GSM2185321	51	unknown	pos	pos	2.21	1.75	not amplified	unknown
GSM2185322	47	good	pos	pos	1.72	1.67	not amplified	unknown
GSM2185323	47	poor	unknown	unknown	unknown	unknown	unknown	unknown
GSM2185324	50	unknown	pos	pos	unknown	unknown	unknown	mutated
GSM2185325	44	unknown	pos	pos	unknown	unknown	unknown	unknown
GSM2185326	69	poor	pos	neg	3.32	-1.99	amplified	unknown
GSM2185327	43	unknown	pos	pos	0.57	0.28	not amplified	unknown
GSM2185329	54	poor	pos	pos	1.76	0.95	not amplified	mutated
GSM2185331	49	unknown	pos	pos	-2.11	-1.3	not amplified	unknown
GSM2185332	54	unknown	pos	pos	3.73	-0.26	not amplified	WT
GSM2185333	45	good	pos	pos	2.28	1.14	not amplified	unknown
GSM2185334	47	poor	pos	pos	0.16	-0.19	not amplified	unknown
GSM2185335	40	unknown	pos	pos	unknown	unknown	unknown	mutated
GSM2185337	53	moderate	pos	unknown	1.84	-2.14	not amplified	unknown
GSM2185338	74	poor	pos	neg	1.94	-3.07	amplified	WT
GSM2185340	68	poor	pos	pos	1.5	-1.38	not amplified	WT
GSM2185341	78	poor	pos	pos	2.8	1.86	not amplified	unknown
GSM2185342	79	unknown	pos	pos	-2.1	-2.38	not amplified	unknown
GSM2185343	64	moderate	pos	pos	4.3	1.71	not amplified	mutated
GSM2185344	66	poor	pos	pos	2.2	1.42	not amplified	unknown
GSM2185345	50	poor	pos	neg	3.23	-3.08	not amplified	WT
GSM2185346	60	poor	pos	pos	1.75	2.01	not amplified	mutated
GSM2185347	81	moderate	pos	neg	2.28	-3.45	amplified	unknown
GSM2185348	70	unknown	pos	pos	2.12	0.47	not amplified	mutated
GSM2185349	52	poor	pos	pos	0.84	-2.37	amplified	WT
GSM2185350	43	poor	pos	pos	1.37	0.52	not amplified	WT
GSM2185351	66	unknown	pos	neg	3.06	-2.86	not amplified	unknown
GSM2185352	33	poor	pos	pos	-0.54	-0.4	not amplified	mutated
GSM2185353	54	unknown	pos	pos	2.17	-1.67	not amplified	unknown
GSM2185354	56	poor	pos	neg	2.23	-3.9	not amplified	unknown
GSM2185355	50	poor	pos	pos	3.69	-2.33	not amplified	unknown
GSM2185356	57	poor	pos	neg	0.62	-2.65	amplified	unknown
GSM2185357	48	poor	pos	pos	2.55	-2.56	not amplified	unknown
GSM2185358	47	poor	pos	unknown	2.17	0.49	not amplified	mutated
GSM2185359	53	unknown	pos	neg	3.71	-4.63	not amplified	unknown
GSM2185360	40	poor	pos	pos	1.97	0.01	amplified	WT
GSM2185361	39	moderate	pos	neg	2.88	-3.31	not amplified	mutated
GSM2185362	47	moderate	pos	pos	0.33	0.5	not amplified	unknown
GSM2185363	43	unknown	pos	pos	3.58	1.24	not amplified	mutated
GSM2185364	41	poor	pos	neg	1.77	-2	not amplified	unknown
GSM2185365	51	poor	pos	neg	0.47	-2.56	amplified	unknown
GSM2185366	63	moderate	pos	unknown	2.36	0.96	not amplified	unknown
GSM2185367	53	moderate	pos	neg	1.41	-2.23	not amplified	unknown
GSM2185368	60	poor	pos	pos	2.56	2.32	not amplified	WT
GSM2185369	38	poor	pos	pos	1.5	-1.13	not amplified	mutated
GSM2185370	40	unknown	pos	pos	0.04	-2.69	not amplified	unknown
GSM2185371	63	poor	pos	pos	2.35	-2.95	not amplified	unknown
GSM2185372	70	poor	pos	neg	3.23	-1.96	not amplified	unknown
GSM2185373	50	poor	pos	pos	1.22	-0.64	not amplified	mutated
GSM2185374	43	unknown	pos	neg	2.13	-3.46	amplified	unknown
GSM2185375	27	moderate	pos	pos	-1.1	-1.32	amplified	unknown
GSM2185376	33	poor	pos	neg	2.56	-2.55	not amplified	WT
GSM2185377	70	poor	pos	pos	2.3	-0.4	not amplified	WT
GSM2185378	73	unknown	pos	pos	2.52	1.53	not amplified	unknown
GSM2185379	54	unknown	pos	neg	2.27	-1.61	not amplified	WT
GSM2185380	51	unknown	pos	pos	1.1	0.54	not amplified	WT
GSM2185381	54	unknown	pos	pos	1.13	1.67	not amplified	unknown
GSM2185382	53	poor	pos	pos	-4.77	-5.88	not amplified	unknown
GSM2185383	44	poor	pos	pos	-0.51	-0.84	amplified	unknown
GSM2185384	58	poor	pos	unknown	3.07	-0.54	not amplified	unknown
GSM2185385	67	moderate	pos	pos	3.23	-0.62	not amplified	unknown
GSM2185386	38	poor	pos	pos	0.64	-0.42	amplified	unknown
GSM2185389	70	unknown	pos	pos	3.85	1.9	not amplified	unknown
GSM2185390	49	unknown	pos	pos	1.5	-1.58	not amplified	mutated
GSM2185391	45	poor	pos	unknown	2.13	1.36	not amplified	unknown
GSM2185392	65	moderate	pos	pos	2.75	0.22	not amplified	mutated
GSM2185393	55	poor	pos	neg	1.64	-4.02	not amplified	mutated
GSM2185394	59	poor	pos	neg	3.02	-2.87	not amplified	mutated
GSM2185395	43	poor	pos	pos	1.98	0.12	not amplified	unknown
GSM2185396	61	poor	pos	neg	3.52	-2.78	not amplified	unknown
GSM2185397	61	unknown	pos	neg	2.8	-3.87	not amplified	unknown
GSM2185398	69	poor	pos	pos	3.92	1.48	not amplified	unknown
GSM2185399	45	moderate	pos	pos	2.22	-0.05	amplified	unknown
GSM2185400	57	unknown	pos	pos	3.23	2.41	not amplified	mutated
GSM2185401	41	unknown	pos	pos	3.86	0.08	not amplified	unknown
GSM2185402	40	poor	pos	pos	2.95	0.59	not amplified	mutated
GSM2185403	50	poor	pos	unknown	0.81	1.47	not amplified	unknown
GSM2185404	82	poor	pos	pos	2.01	0.03	not amplified	unknown
GSM2185405	41	poor	pos	unknown	0.49	-0.01	not amplified	unknown
GSM2185406	61	poor	pos	pos	2.64	1.1	not amplified	WT
GSM2185407	62	poor	pos	pos	2.53	1.79	not amplified	mutated
GSM2185408	47	unknown	pos	pos	2.68	1.31	not amplified	unknown
GSM2185409	51	unknown	pos	pos	1.28	-0.69	not amplified	unknown
GSM2185410	72	poor	pos	pos	1.35	unknown	unknown	unknown
GSM2185411	67	unknown	pos	pos	0.8	-3.99	not amplified	WT
GSM2185412	34	poor	pos	neg	2.62	-2.8	not amplified	unknown
GSM2185413	37	moderate	pos	pos	2.32	1.94	not amplified	mutated
GSM2185414	75	poor	pos	pos	-1.53	-3.14	amplified	unknown
GSM2185415	51	poor	pos	pos	1.86	1.23	not amplified	unknown
GSM2185416	45	poor	pos	pos	0.11	1.07	not amplified	unknown
GSM2185417	78	moderate	pos	pos	0.98	0.45	not amplified	mutated
GSM2185418	60	moderate	pos	pos	0.87	-3.47	not amplified	unknown
GSM2185419	48	unknown	pos	pos	unknown	unknown	unknown	unknown
GSM2185420	76	poor	pos	neg	0.26	-2.08	not amplified	WT
GSM2185421	47	poor	pos	pos	-0.3	2.74	not amplified	unknown
GSM2185422	48	poor	pos	pos	0.08	-0.33	not amplified	unknown
GSM2185423	42	poor	pos	pos	1.22	1.57	not amplified	unknown
GSM2185424	62	poor	pos	unknown	2.89	0.6	not amplified	unknown
GSM2185425	64	poor	pos	pos	1.57	2.38	not amplified	unknown
GSM2185426	58	poor	pos	pos	1.6	1.26	not amplified	unknown
GSM2185427	55	moderate	pos	pos	3.8	1.92	not amplified	unknown
GSM2185428	36	unknown	pos	pos	0.74	0.24	not amplified	mutated
